# Supplementary material for: Long noncoding RNA BFAL1 mediates enterotoxigenic Bacteroides fragilis-related carcinogenesis in colorectal cancer via the RHEB/mTOR pathway
Source: PubMed Central journal article supplement (PMC6742644; doi:10.1038/s41419-019-1925-2), 2019-09-12

# Supplementary Figure S1

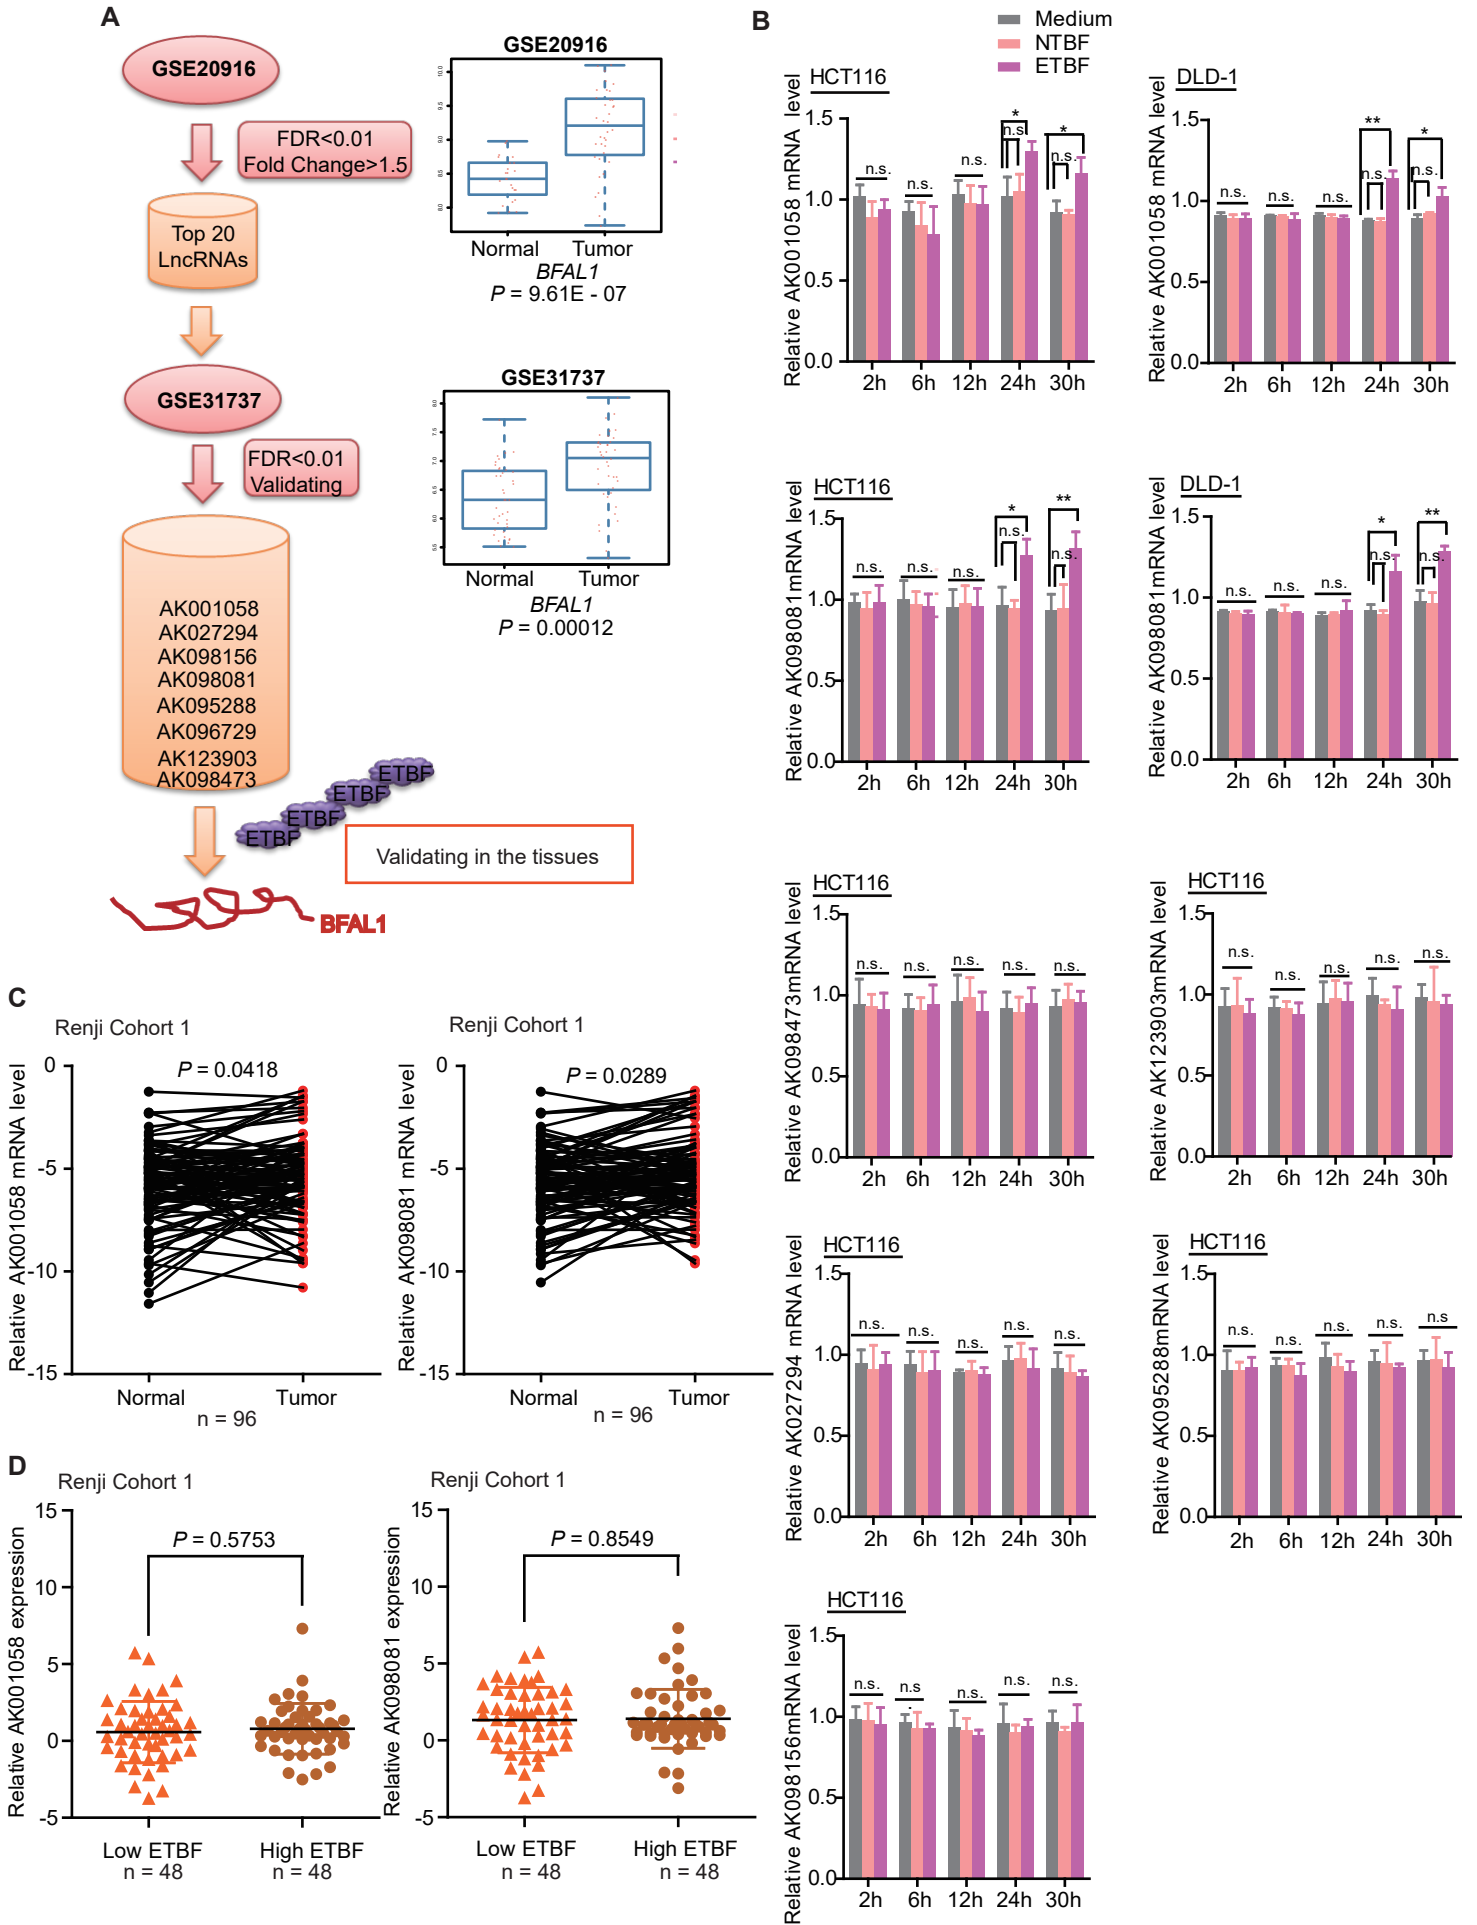

# Supplementary Figure S1

E

## BFAL1 sequence

```
TCCTGGGCTCAAGCGATCCTCCCACCTGAGTCTCCTGAGTACCTGGGACC
ACAGGCACATGCTAACGCACCCACTTAATTTTTTTTATTCGTAGAGCCGAG
GTCTCACTATGTTGCCAGACTGGTCTCAAGCTCTTGGGCTCAAGCAGTC
CTCCTGCCTCAGCCTCCCAAAGTGCCAGGATTACAGGTGTGAGCCACCAC
ACCCAGTCCAAAAAGTGATTTTCTAATTCATAGTTTCTTCTACATTTCT
TAAGTGAATTTTGTAAAGGAAGAGTTATCCTTATTCATTTATTTACCCAT
TTACTTGTAGGAGCATGTATCATAAATTCTTAATCTATGGGGTGTAGTTA
GCTACTGTAAATTTGATGCACATATTTTCCAGATTCAATAAGTAGGATC
CCCATCAAGCTATCTTCTGAATCTTTAAAAATGTATTCTCCTTATTTTCAT
GGGTATATAATTATTTTCTGGGCAACAGTTTGTTCATGGTACATTTGTCT
CCAGCCCTAGACTCAGAAAAATGTAATTTATTTAATGGAGAATACTATT
TAGAAGCTGCAGTCTCTGTGTAGGGAGGTGTTCCCTAGGTAATAGTGCCT
GGCTTTTAGGTCTTCTCTATGGAGGATATGGCAAAGACATACAAAATTAT
ATATACGTATCCACACATTAATAACTCTATTTCTATATTA AAAACATGAC
CACAAGCCAACACTTTTAATCCACTGCAGCACTGCTGGGTTATTTCTTG
CTTTCCAAATCCCTTGTCTGTAGCTATCTTTCATCACTTGCAAAAATAG
CACGTGCTCAATCCTAGATTAAAAATAAGCTACTCTCAGAATTGATAAC
TCATACCCTCTTTTTAAAAATCAACTAACCAGAATTCAGTTTTTATTCA
CAGTTCTTATCTTTAGCTCAGGGCGTAATATAAAAGCACTAGGTTTAAAA
CTTACTTGGTCAGCAGCAATCCACTTCTAGGTACATGTCCAAAGGAAGT
AAGAAAGCATCTCAATGTGTGAATGCCTACCTGTGTTTCATTGCAGCATT
TTCAGAAGAGCCAAGAGGTGGAAGCAAAGTAAATGTCCATTGACAGATGA
ATTGGTAAACAAAATGCATTATATACATACAATGCAATATCATTTAGCCT
TAAAAACAAAATTCTGCCATATGCTACAACATGGACGTTATGCTAAGTGA
AATAAAC CAG
```

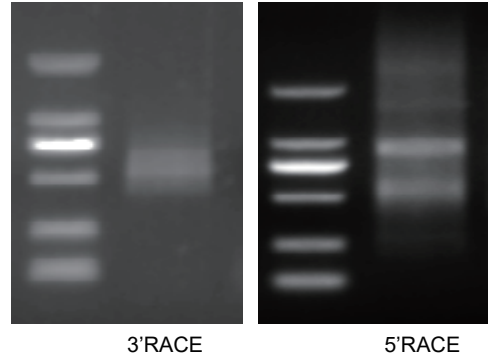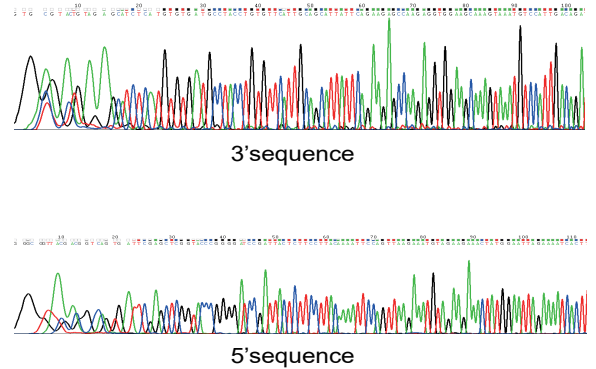

F

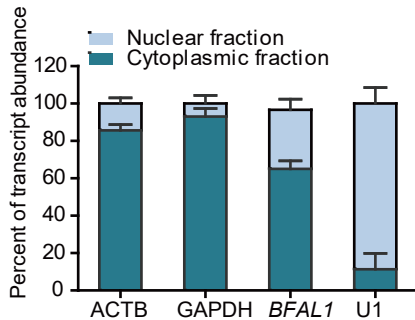

G

## Ab Inito ncRNA transcriptome predictor

Checking and correcting sequence...  
 Number of sequences to be processed: 1  
 Predicting ncRNA.../work/ncRNA/web/ncRNA\_180611744340829/Input\_180611744340829.tx

| Sequence name | Coding Probability | Non-coding Probability |
|---------------|--------------------|------------------------|
| AK096729.1    | 4.78%              | 95.22%                 |

H

|                   |                    |                 |  |
|-------------------|--------------------|-----------------|--|
| HOMOLOGY FEATURES | HIT NUM            | 3               |  |
|                   | HIT SCORE          | 11.365636671002 |  |
|                   | FRAME SCORE        | 43.059232312413 |  |
| ORF_FRAMEFINDER   | COVERAGE           | 5.74 %          |  |
|                   | LOG-ODDS SCORE     | 29.77           |  |
|                   | TYPE               | Full            |  |
|                   | Legend: non-coding |                 |  |

I

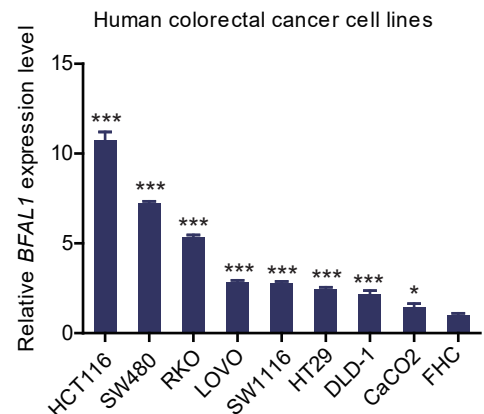

J

Renji Cohort 1

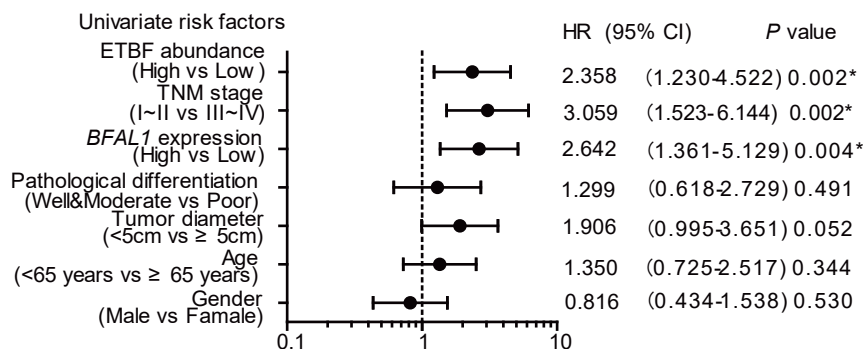

Supplement: 41419_2019_1925_MOESM1_ESM.pdf [file 41419_2019_1925_MOESM1_ESM.pdf]
