# Supplementary material for: Long noncoding RNA BFAL1 mediates enterotoxigenic Bacteroides fragilis-related carcinogenesis in colorectal cancer via the RHEB/mTOR pathway
Source: PubMed Central journal article supplement (PMC6742644; doi:10.1038/s41419-019-1925-2), 2019-09-12

# Supplementary Figure S2

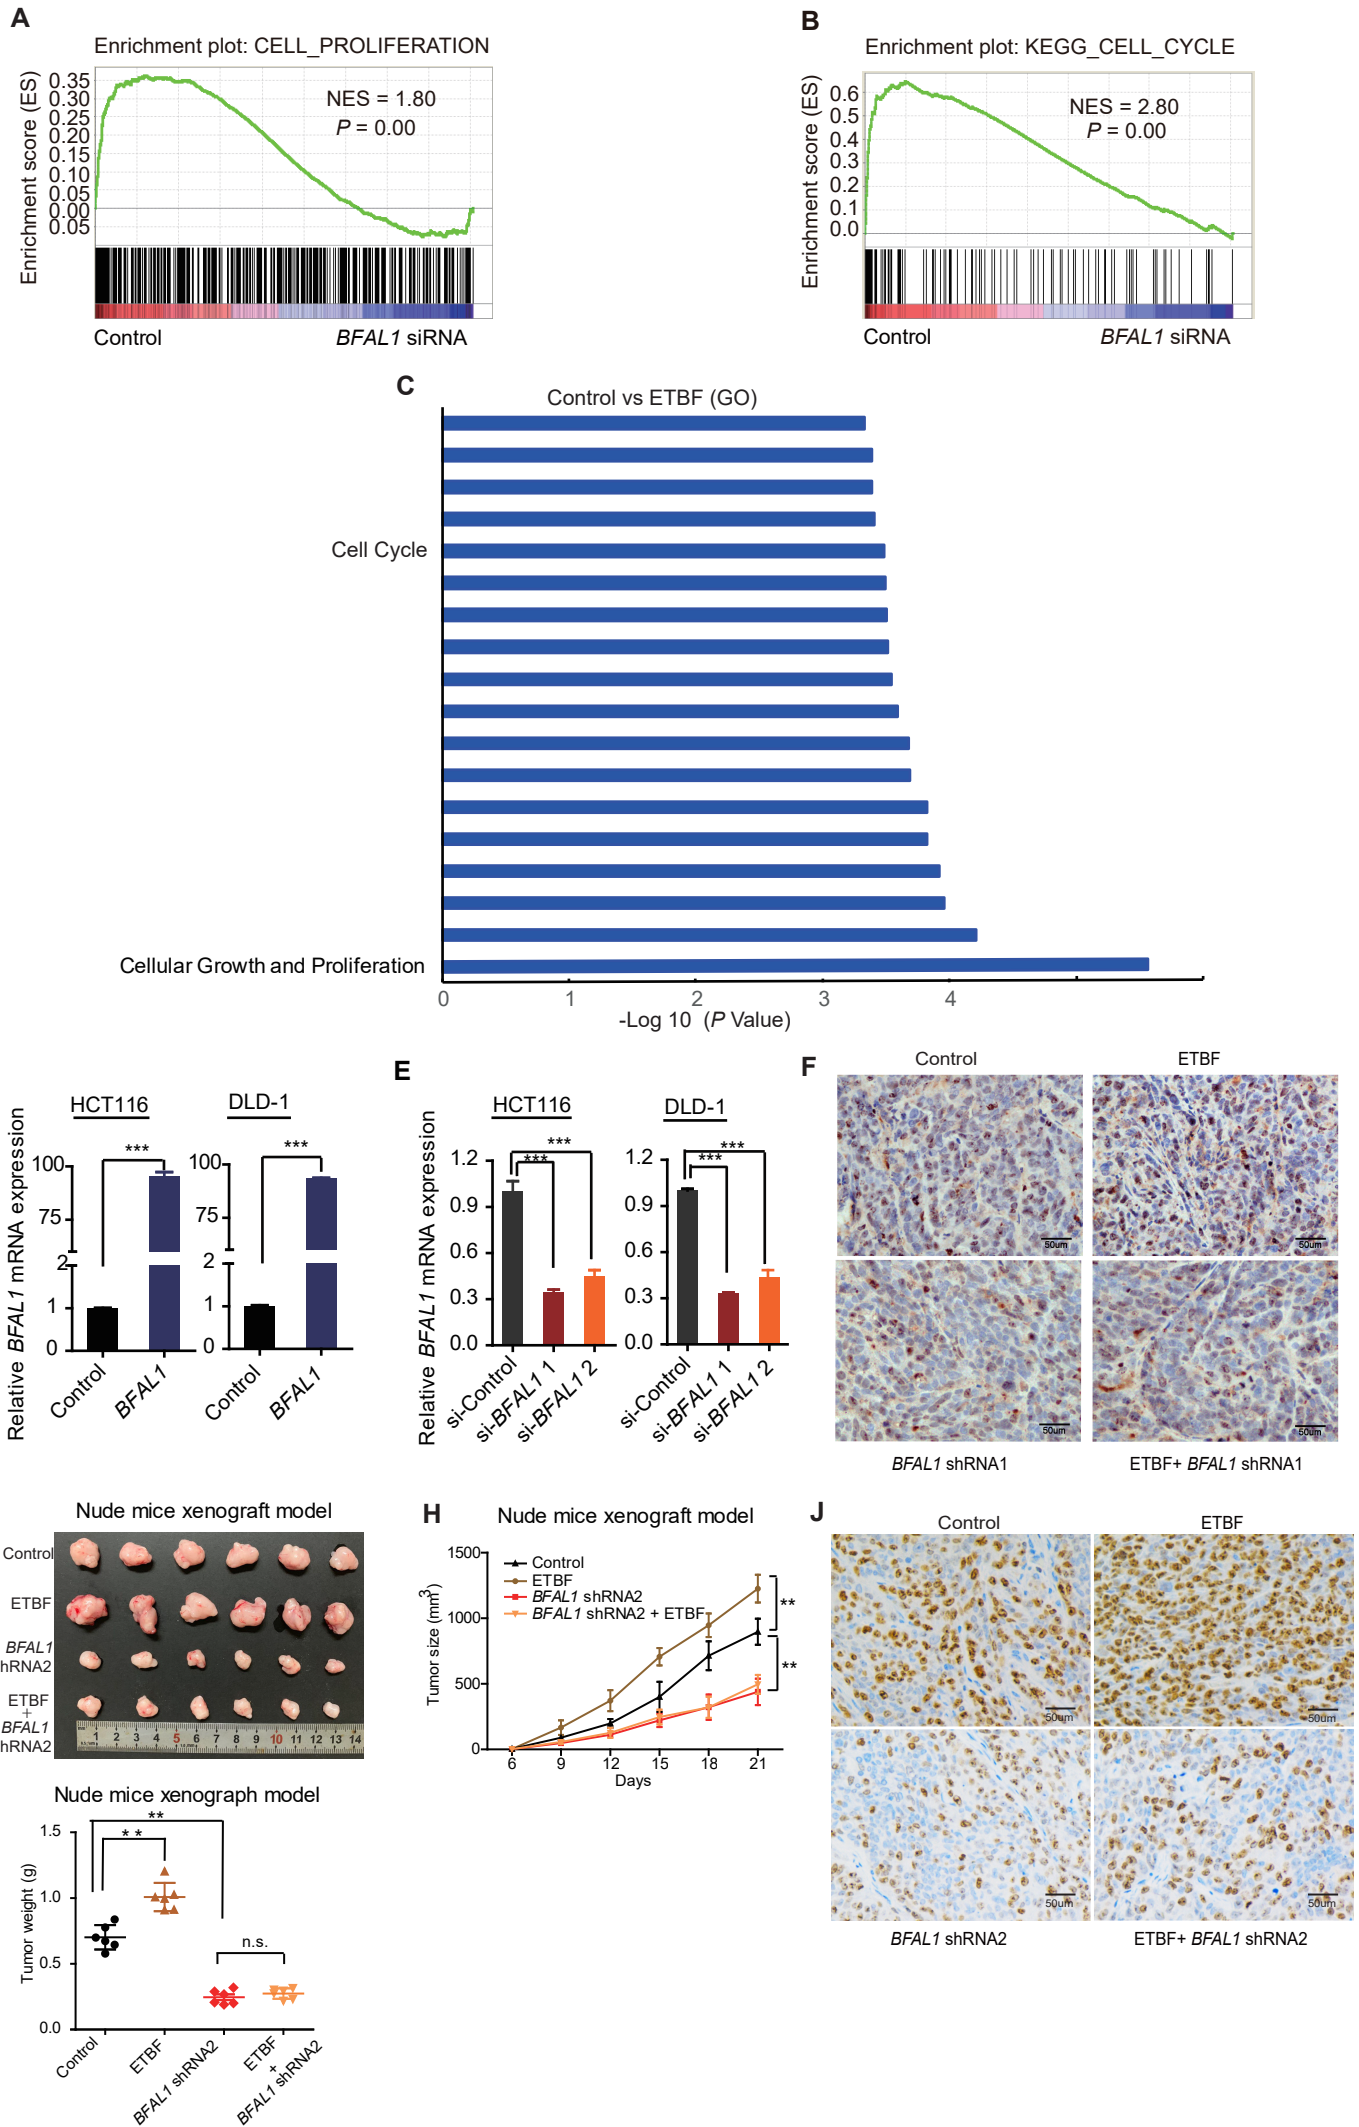

Supplement: 41419_2019_1925_MOESM2_ESM.pdf [file 41419_2019_1925_MOESM2_ESM.pdf]
