# Supplementary material for: Long noncoding RNA BFAL1 mediates enterotoxigenic Bacteroides fragilis-related carcinogenesis in colorectal cancer via the RHEB/mTOR pathway
Source: PubMed Central journal article supplement (PMC6742644; doi:10.1038/s41419-019-1925-2), 2019-09-12
Supplement: 41419_2019_1925_MOESM4_ESM.pdf [file 41419_2019_1925_MOESM4_ESM.pdf]

Supplementary Table S1: Clinical information of 96 cases CRC patients

| Gender | Age | Tumor size (cm) | TNM Stage | Survival | Status |
|--------|-----|-----------------|-----------|----------|--------|
| Male   | 66  | 3.5*3*0.5       | T3N0M0    | 60       | Alive  |
| Male   | 77  | 5*3*0.5         | T4N1M0    | 60       | Alive  |
| Male   | 30  | 5.5*2.5*1       | T4N2M0    | 59       | Alive  |
| Male   | 85  | 5.5*5*0.5       | T4N1M0    | 60       | Alive  |
| Female | 78  | 2*2*0.5         | T3N0M1    | 39       | Dead   |
| Male   | 48  | 5*2*1           | T4N2M0    | 19       | Dead   |
| Male   | 55  | 5*4*0.5         | T4N0M0    | 59       | Alive  |
| Male   | 71  | 1.5*1*0.5       | T4N0M0    | 59       | Alive  |
| Male   | 61  | 5.5*3*1         | T3N1M1    | 29       | Dead   |
| Female | 39  | 7*5*5           | T4bN0M0   | 59       | Alive  |
| Female | 64  | 4*3*2           | T3N0M0    | 58       | Alive  |
| Male   | 68  | 7.5*5*1.5       | T4N0M0    | 38       | Dead   |
| Female | 72  | 2*2             | T1N0M0    | 58       | Alive  |
| Male   | 49  | 5*3*1.5         | T4N0M1    | 33       | Dead   |
| Male   | 75  | 4*3*1           | T3N0M0    | 57       | Alive  |
| Male   | 40  | 5*4*1           | T3N0M0    | 57       | Alive  |
| Male   | 50  | 5.5*2.5*1.5     | T3N0M0    | 57       | Alive  |
| Male   | 69  | 4*4*1           | T2N0M0    | 55       | Alive  |
| Male   | 48  | 4.5*2*1         | T4N2M0    | 35       | Dead   |
| Male   | 79  | 5*4*1           | T4N0M0    | 19       | Dead   |
| Female | 51  | 6*4.5*1         | T3N1M0    | 57       | Alive  |
| Male   | 74  | 5*4*1           | T4N0M0    | 21       | Dead   |
| Male   | 44  | 5*4*1           | T4N0M0    | 39       | Alive  |
| Male   | 74  | 5.5*4*1         | T4N1M0    | 39       | Alive  |
| Male   | 55  | 5.5*3.5*0.5     | T3N0M0    | 43       | Alive  |
| Male   | 51  | 5.5*4*1         | T4N1M1    | 33       | Dead   |
| Male   | 61  | 9*6*1           | T4N2M0    | 41       | Alive  |
| Female | 82  | 8*2*1.5         | T3N0M0    | 41       | Alive  |
| Male   | 64  | 3*2*0.5         | T4N1M0    | 34       | Dead   |
| Female | 61  | 6*5*1           | T3N0M1    | 38       | Dead   |
| Female | 81  | 9*3.5*3         | T4N2M1    | 21       | Dead   |
| Male   | 65  | 2*2*1           | T3N1M0    | 23       | Alive  |
| Male   | 62  | 4*3*1           | T3N1M0    | 38       | Alive  |
| Female | 65  | 3*3*1.8         | T4aN1M0   | 33       | Dead   |
| Female | 67  | 4*4*0.8         | T4N1M1    | 41       | Dead   |
| Male   | 46  | 6*4*1.2         | T4N1M0    | 22       | Dead   |
| Female | 77  | 4.5*4.5*1       | T2N1M0    | 24       | Dead   |
| Male   | 78  | 4.5*4*1         | T2N0M0    | 45       | Alive  |
| Male   | 73  | 5*4*0.5         | T4N0M0    | 23       | Dead   |
| Male   | 55  | 5*2*1           | T4aN0M0   | 37       | Alive  |
| Female | 49  | 2*2*0.5         | T2N2aM0   | 31       | Dead   |
| Female | 85  | 4*3*1           | T3N2M0    | 27       | Dead   |
| Male   | 55  | 1*1*1           | T2N0M0    | 60       | Alive  |
| Female | 79  | 4*3*1           | T3N0M0    | 37       | Alive  |
| Female | 84  | 4*4*2           | T4aN2aM0  | 37       | Alive  |
| Male   | 67  | 5*3.5*0.7       | T4aN2M1   | 23       | Dead   |
| Female | 59  | 4*3.5*0.7       | T4N0M0    | 34       | Dead   |
| Male   | 61  | 8*6*2           | T4N2M0    | 44       | Alive  |
| Female | 80  | 5*4*1.5         | T3N0M0    | 43       | Alive  |
| Female | 52  | 2*2*1.3         | T2N0M0    | 42       | Alive  |
| Male   | 88  | 5*3.5*1         | T4aN0M0   | 26       | Dead   |
| Male   | 55  | 3*3*1           | T4N1M0    | 42       | Alive  |
| Female | 86  | 5.5*3*1.5       | T4N1M1    | 25       | Dead   |
| Male   | 62  | 5*3*1           | T4aN1M0   | 42       | Alive  |
| Male   | 52  | 2.5*2.5*1       | T2N0M0    | 42       | Alive  |
| Female | 64  | 2.8*2.5*1       | T2N0M0    | 40       | Alive  |
| Female | 60  | 5*2*1.5         | T4aN0M0   | 23       | Dead   |
| Male   | 77  | 5*4*1           | T2N0M0    | 41       | Alive  |
| Female | 25  | 6*3*1.5         | T4N2M0    | 34       | Dead   |
| Male   | 65  | 5               | T4N0M0    | 21       | Dead   |
| Male   | 58  | 3.5*3.5*2       | T2N0M0    | 41       | Alive  |
| Male   | 62  | 6*5*1           | T4N2M1    | 11       | Dead   |
| Male   | 67  | 4*3*1           | T2N0M0    | 41       | Alive  |
| Male   | 72  | 6*5*1           | T4N1M0    | 41       | Alive  |
| Female | 58  | 3.5*3*1         | T2N0M0    | 40       | Alive  |
| Female | 72  | 8*5*1.5         | T4N0M0    | 21       | Dead   |
| Male   | 56  | 5.5*4*1.5       | T4N1M1    | 37       | Dead   |
| Male   | 57  | 3.5*2.5*0.6     | T2N1M0    | 33       | Dead   |
| Female | 80  | 7*5*5           | T4N1M0    | 40       | Alive  |
| Female | 64  | 4*3.5*4.2       | T4N0M0    | 21       | Dead   |
| Female | 62  | 4               | T3N0M0    | 39       | Alive  |

|        |    |             |         |    |       |
|--------|----|-------------|---------|----|-------|
| Male   | 64 | 6.5*1*0.5   | T4N1M0  | 38 | Alive |
| Female | 39 | 2*2*0.5     | T1N0M0  | 36 | Alive |
| Male   | 60 | 4*3*1       | T2N1M0  | 37 | Alive |
| Male   | 67 | 6*4*3       | T4N2M1  | 7  | Dead  |
| Male   | 56 | 6*4*2       | T2N0M1  | 34 | Dead  |
| Male   | 61 | 5*4*3       | T4N2M0  | 19 | Dead  |
| Male   | 43 | 9*4*1.5     | T4N1M0  | 29 | Dead  |
| Female | 80 | 2.3*2.2*0.5 | T3NIM0  | 26 | Dead  |
| Male   | 62 | 2.5*2*0.7   | T3N0M0  | 33 | Alive |
| Male   | 53 | 5.5*4*0.5   | T4N0M0  | 33 | Alive |
| Male   | 72 | 3.5*3.5*0.4 | T2N0M0  | 33 | Alive |
| Male   | 57 | 6*6*6       | T4N0M1  | 27 | Dead  |
| Female | 67 | 3*3*0.4     | T2N1M0  | 29 | Dead  |
| Male   | 41 | 5*3*0.6     | T4N2M0  | 32 | Alive |
| Male   | 87 | 5*4*1       | T4N2M0  | 24 | Dead  |
| Female | 58 | 3.5*2.5*1   | T2N0M0  | 39 | Alive |
| Male   | 50 | 4.5*2*1.2   | T2N0M0  | 38 | Alive |
| Male   | 77 | 7*6*1       | T2N0M0  | 30 | Alive |
| Male   | 69 | 5*3.5*1     | T2N2M0  | 21 | Alive |
| Male   | 59 | 3.5*3*0.5   | T4N0M0  | 28 | Dead  |
| Male   | 70 | 5*5*1.5     | T4N1M0  | 21 | Alive |
| Female | 79 | 3.5*3*1     | T4aN0M0 | 26 | Alive |
| Female | 58 | 2*2*0.5     | T3N0M0  | 23 | Alive |
| Male   | 58 | 3*3*1       | T4aN1M0 | 27 | Alive |
| Male   | 72 | 2*2*0.3     | T4aN2M0 | 22 | Alive |
