# Supplementary material for: Long noncoding RNA BFAL1 mediates enterotoxigenic Bacteroides fragilis-related carcinogenesis in colorectal cancer via the RHEB/mTOR pathway
Source: PubMed Central journal article supplement (PMC6742644; doi:10.1038/s41419-019-1925-2), 2019-09-12
Supplement: 41419_2019_1925_MOESM5_ESM.pdf [file 41419_2019_1925_MOESM5_ESM.pdf]

**Supplementary Table S2: mTOR related genes in KEGG\_MTOR\_SIGNALING\_PATHWAY**

| Gene     | Rank Metric Score | Running ES | Core Enrichment |
|----------|-------------------|------------|-----------------|
| VEGFB    | 3.161638975       | 0.07358044 | Yes             |
| EIF4EBP1 | 2.223654747       | 0.10691172 | Yes             |
| PGF      | 2.045122623       | 0.15341493 | Yes             |
| CAB39L   | 1.743314862       | 0.18186755 | Yes             |
| MAPK1    | 1.652658463       | 0.21956748 | Yes             |
| FIGF     | 1.553957105       | 0.25245178 | Yes             |
| ULK2     | 1.525366306       | 0.2900106  | Yes             |
| PIK3CD   | 1.481941104       | 0.3258293  | Yes             |
| AKT3     | 1.362404346       | 0.34963745 | Yes             |
| EIF4E    | 1.345869899       | 0.38330996 | Yes             |
| MLST8    | 1.098068476       | 0.37520814 | Yes             |
| RHEB     | 1.066649556       | 0.39904526 | Yes             |
| RPS6KA2  | 0.767386079       | 0.35229874 | No              |
| RPS6KB1  | 0.754489005       | 0.36953112 | No              |
| MTOR     | 0.708305895       | 0.37552634 | No              |
| RICTOR   | 0.487957418       | 0.32323012 | No              |
| STK11    | 0.439735293       | 0.31790605 | No              |
| AKT2     | 0.374434322       | 0.30450383 | No              |
| PIK3R1   | 0.358725429       | 0.30837616 | No              |
| HIF1A    | 0.354271799       | 0.31633183 | No              |
| AKT1     | 0.327425271       | 0.3135248  | No              |
| PDPK1    | 0.313973755       | 0.31725836 | No              |
| PIK3CB   | 0.281619281       | 0.31264737 | No              |
| CAB39    | 0.233627111       | 0.30192676 | No              |
| VEGFA    | 0.199731082       | 0.2947208  | No              |
| RPS6KA3  | 0.16075772        | 0.2825762  | No              |
| RPTOR    | 0.159043834       | 0.28595805 | No              |
| EIF4B    | 0.137072593       | 0.28047764 | No              |
| RPS6KA1  | 0.116984822       | 0.27503344 | No              |
| RPS6KB2  | 0.11019212        | 0.27467158 | No              |
| TSC1     | -0.006499067      | 0.22507598 | No              |
| MAPK3    | -0.039038088      | 0.21408999 | No              |
| RPS6     | -0.104260527      | 0.18963517 | No              |
| TSC2     | -0.105843812      | 0.19181104 | No              |
| DDIT4    | -0.231294319      | 0.14886539 | No              |
| ULK3     | -0.24029085       | 0.15128584 | No              |
| PIK3R5   | -0.348122478      | 0.11634074 | No              |
| EIF4E2   | -0.411963969      | 0.10248541 | No              |
| PIK3CA   | -0.441056788      | 0.10347886 | No              |
| PIK3R2   | -0.796122313      | 0.01224577 | No              |
| BRAF     | -0.89815402       | 0.01054868 | No              |
| PRKAA1   | -0.915527761      | 0.0310395  | No              |
| ULK1     | -0.925451219      | 0.05338917 | No              |
| PIK3R3   | -1.676111937      | -0.0238807 | No              |
| STRADA   | -1.681132317      | 0.02064394 | No              |
| IGF1     | -1.908586502      | 0.05255703 | No              |
