# Supplementary material for: Long noncoding RNA BFAL1 mediates enterotoxigenic Bacteroides fragilis-related carcinogenesis in colorectal cancer via the RHEB/mTOR pathway
Source: PubMed Central journal article supplement (PMC6742644; doi:10.1038/s41419-019-1925-2), 2019-09-12
Supplement: 41419_2019_1925_MOESM6_ESM.pdf [file 41419_2019_1925_MOESM6_ESM.pdf]

## Supplementary Material Tables

**Table 1. Primers of lncRNAs and genes**

| Gene                | Forward primer                 | Reverse Primer                 |
|---------------------|--------------------------------|--------------------------------|
| <i>BFAL1</i>        | 5'-TAGAGCCGAGGTCTCACTATGT-3'   | 5'-TCACTTTTTGGACTGGGTGT-3'     |
| AK001058            | 5'-ACACCTCCGTCCAATCTCCTGAG-3'  | 5'-CAGTTCATGTCATGTGGCCTCTCC-3' |
| AK027294            | 5'-TTACTCAGGTGTGCTTAGGTGTGC-3' | 5'-TTCCAGTCTTGGTCTGCTGTTTCC-3' |
| AK098156:           | 5'-GACGCCTGCCTCTTGTATCCAC-3'   | 5'-GCTGAGATCATGCCACTGTACTCC-3' |
| AK098081            | 5'-GGAGTGCAGTGGTGACATCATAGC-3' | 5'-CATAGTAAGGCCGTGTGCAGTGG-3'  |
| AK095288            | 5'-GCACGATCTTGGCTCACTGC-3'     | 5'-GCAATTAGCCGGGTGTGGTG-3'     |
| AK123903:           | 5'-GCGGCCAGCTTCTTCTTTC-3'      | 5'-CTAAGGTCCCAGCTCTCTGG-3'     |
| AK098473            | 5'-ACCACTGTGGCTGCCCTTAA-3'     | 5'-TGGCCCAGTGTCTTCTCCAGG-3'    |
| <i>RHEB</i>         | 5'-GGAGGAGGAAGGTTTCAAGGAGAC-3' | 5'-CTATGAGGACGGCACTCGCAATG-3'  |
| <i>ACTB</i>         | 5'-CCTTGCACATGCCGGAG-3'        | 5'-RGCACAGAGCCTCGCCTT-3'       |
| ETBF ( <i>bft</i> ) | 5'-GGATACATCAGCTGGGTTGTAG-3'   | 5'-GCGAACTCGGTTTATGCAGT-3'     |
| 16S                 | 5'-GGTGAATACGTTCCCGG-3'        | 5'-TACGGCTACCTTGTACGACTT-3'    |
| <i>GAPDH</i>        | 5'-GCATTGCCCTCAACGACCAC -3'    | 5'-CCACCACCCTGTTGCTGTAG -3'    |

**Table 2. Primers of miRNA by GeneCopia**

| microRNA    | Catalog    |
|-------------|------------|
| miR-155-5P  | HmiRQP0221 |
| miR-200a-3P | HmiRQP0298 |
| miR-199a-5p | HmiRQP0290 |
| miR-495-3p  | HmiRQP053  |
| U6          | HmiRQP9001 |

**Table 3. SiRNAs and miRNAs mimics/inhibitors**

| Gene Name                        | Forward                        | Reverse                        |
|----------------------------------|--------------------------------|--------------------------------|
| <i>BFAL1</i> siRNA1              | 5'-GGGAGGUGUCCUAGGUAATT-3'     | 5'-UUACCUAGGAACACCUCCTT-3'     |
| <i>BFAL1</i> siRNA2              | 5'-GAAGAGUUAUCCUUAUUCATT-3'    | 5'-UGAAUAAGGAUAACUCUUCTT-3'    |
| <i>RHEB</i> siRNA                | 5'-GGUGAUCAGUUAUGAAGAATT-3'    | 5'-UUCUUCUAACUGAUCACCTT-3'     |
| Control siRNA/<br>mimics control | 5'-UUCUCCGAACGUGUCACGUTT-3'    | 5'-ACGUGACACGUUCGGAGAATT-3'    |
| miR-155-5p mimics                | 5'--UUAUUGCUGUAGGUGUAGGGGU-3'  | 5'--CCCUAUCACGAUUAAGCAUUAUU-3' |
| miR-200a-3p mimics               | 5'--UAACACUGUCUGGUAACGAUGU-3'  | 5'-AUCGUUACCAGACAGUGUUAUU-3'   |
| miR-155-5p inhibitor             | 5'--ACCCCUAUCACGAUUAAGCAUUA-3' |                                |
| miR-200a-3p inhibitor            | 5'-ACAUCGUUACCAGACAGUGUUA-3'   |                                |
| Inhibitor control                | 5'-CAGUACUUUUGUGUAGUACAA-3'    |                                |
