# Supplementary material for: Long noncoding RNA BFAL1 mediates enterotoxigenic Bacteroides fragilis-related carcinogenesis in colorectal cancer via the RHEB/mTOR pathway
Source: PubMed Central journal article supplement (PMC6742644; doi:10.1038/s41419-019-1925-2), 2019-09-12

# WB original figures

**Fig. 3F**

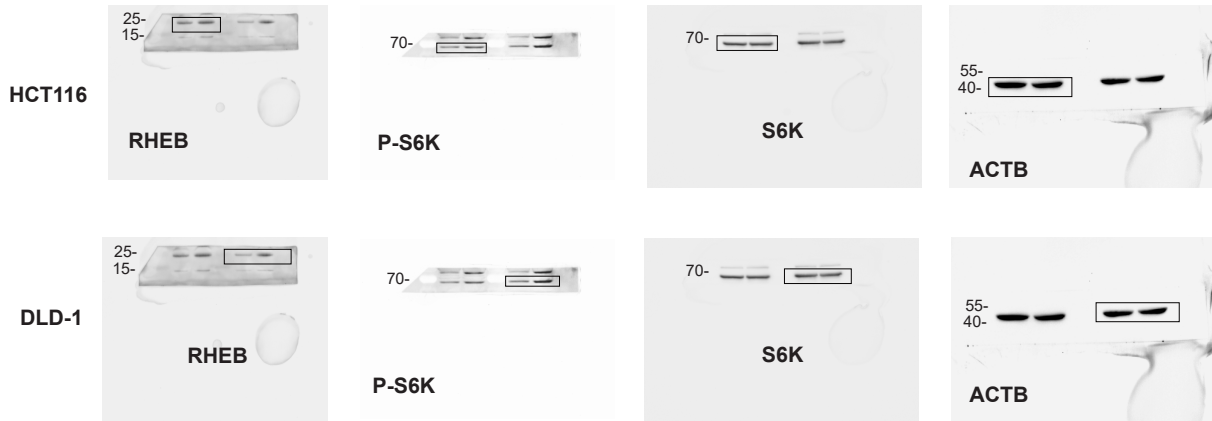

**Fig. 3G**

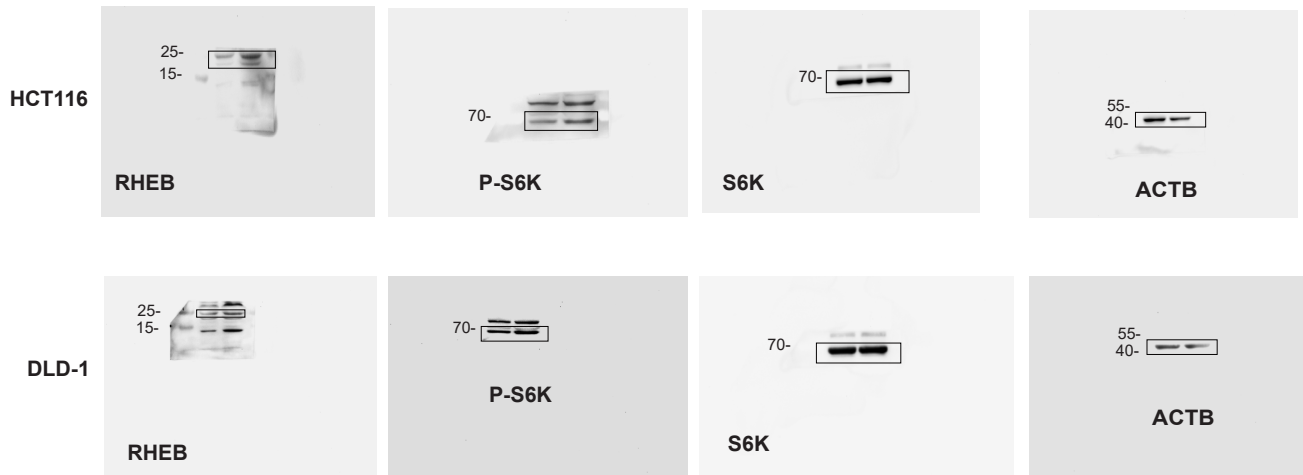

**Fig. 3H**

These WB were film-exposed in the darkroom with different exposure time.

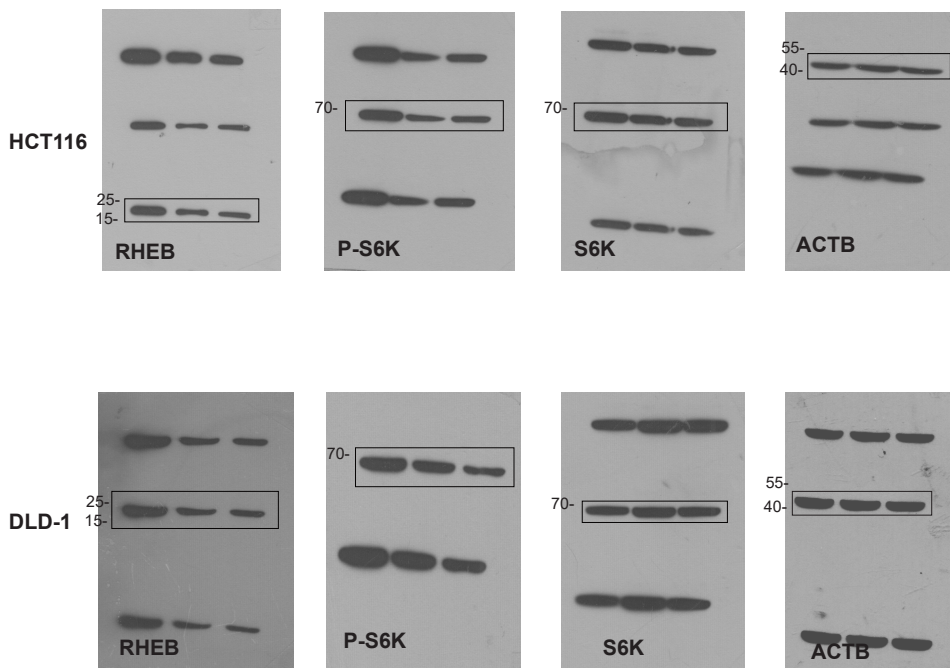

# WB original figures

Fig.3I

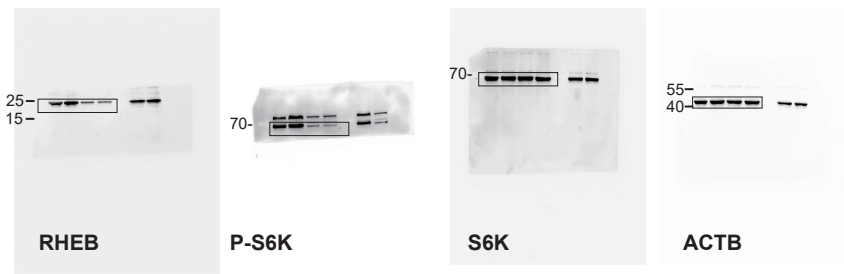

Fig. 3J

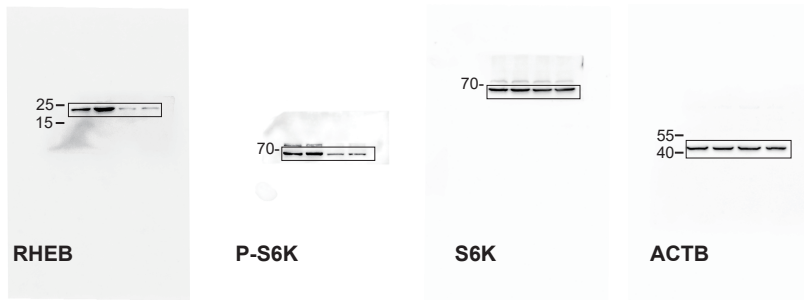

Fig. 4C

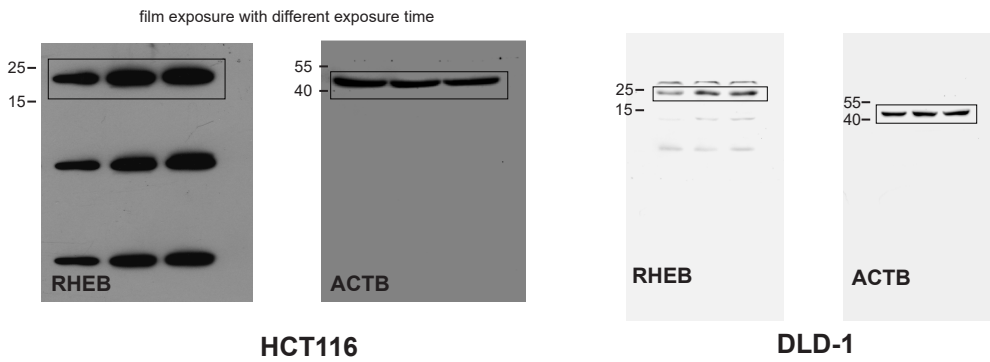

Fig. 4E

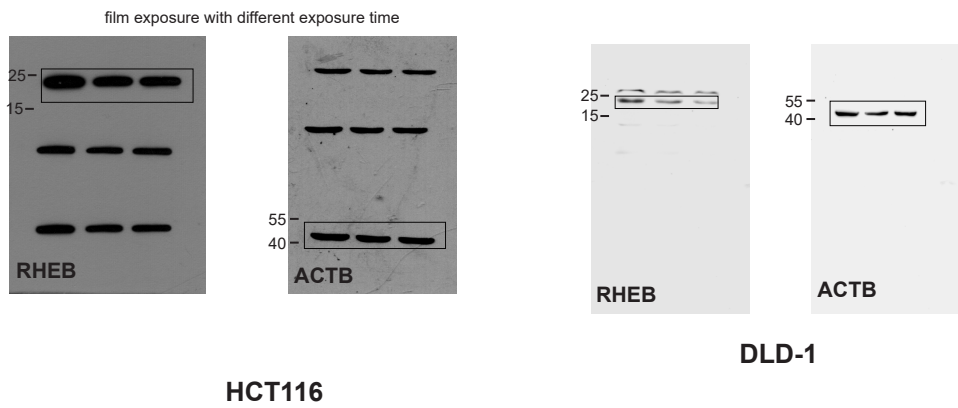

Supplement: 41419_2019_1925_MOESM7_ESM.pdf [file 41419_2019_1925_MOESM7_ESM.pdf]
